# Supplementary material for: Investigation of the Effect of Three Commercial Water Acidifiers on the Performance, Gut Health, and Campylobacter jejuni Colonization in Experimentally Challenged Broiler Chicks
Source: MDPI journal article supplement (doi:10.3390/ani13122037), 2023-06-20
Supplement: s1 [file s1]

## Article

# Investigation of the Effect of Three Commercial Water Acidifiers on the Performance, Gut Health, and *Campylobacter jejuni* Colonization in Experimentally Challenged Broiler Chicks

Tilemachos Mantzios<sup>1</sup>, Vasilios Tsiouris<sup>1</sup>, Georgios A. Papadopoulos<sup>2</sup>, Vangelis Economou<sup>3</sup>, Evanthia Petridou<sup>4</sup>, Georgia D. Brellou<sup>5</sup>, Ilias Giannenas<sup>6</sup>, Costas G. Biliaderis<sup>7</sup>, Konstantinos Kiskinis<sup>1</sup>, and Paschalis Fortomaris<sup>4</sup>.

**Table S1.** Ingredients and calculated analysis of the starter (1 to 15 days) and for finisher (16 to 39 d) diets.

| Ingredients (g/kg feed)    | Starter<br>(1-15 days) | Finisher<br>(16-39 days) |
|----------------------------|------------------------|--------------------------|
| Wheat                      | 461.5                  | 390                      |
| Soybean meal (CP 47%)      | 304                    | 273                      |
| Corn                       | 100                    | 212                      |
| Soybean oil                | 50                     | 55                       |
| Fish meal 65%              | 25                     | 12.3                     |
| Nutriphos 22%              | 15.3                   | 12.7                     |
| Calcium carbonate          | 12.8                   | 10.9                     |
| Phytogenic fat (99%)       | -                      | 20.5                     |
| Gluten 60%                 | 14.2                   | -                        |
| Adisodium                  | 2.4                    | 2                        |
| Threonine-L                | 1.3                    | 0.5                      |
| Choline CL 50%             | 0.2                    | -                        |
| Methionine DL              | 2.1                    | 1.7                      |
| Lysine HCL                 | 2.7                    | 1.5                      |
| Salt                       | 1.5                    | 1.9                      |
| Vitamin premix2            | 2                      | 2                        |
| Nutrients premix3          | 2                      | 2                        |
| Clinacox                   | 0.2                    | 0.2                      |
| Smectagri                  | 2                      | 2                        |
| Xylanase 8000 G            | 0.3                    | 0.3                      |
| Calculated analysis (g/kg) |                        |                          |
| Moisture                   | 10.48                  | 10.51                    |
| Dry matter                 | 89.41                  | 89.38                    |
| Crude protein              | 22.84                  | 19.50                    |
| Crude fibre                | 2.34                   | 2.29                     |
| Crude fat                  | 6.74                   | 9.45                     |
| Crude Ash                  | 6.25                   | 5.45                     |
| Starch                     | 35.50                  | 38.00                    |
| Methionine                 | 0.54                   | 0.46                     |
| Methionine + Cysteine      | 0.99                   | 0.84                     |
| Lysine                     | 1.41                   | 1.15                     |
| Threonine                  | 0.96                   | 0.77                     |
| Tryptophan                 | 0.28                   | 0.24                     |
| Arginine                   | 1.47                   | 1.29                     |

|                  |         |         |
|------------------|---------|---------|
| Valine           | 1.06    | 0.92    |
| Leucine          | 1.76    | 1.51    |
| Isoleucine       | 0.96    | 0.83    |
| Linoleic acid    | 3.34    | 5.75    |
| Calcium          | 0.97    | 0.79    |
| Phosphorus       | 0.78    | 0.66    |
| Sodium Chloride  | 0.15    | 0.19    |
| Energy (Kcal/kg) | 3018.00 | 3200.26 |

<sup>2</sup>Contents per kg: 6,000,000 I.U. retinyl acetate; 2,000,000 I.U. cholecalciferol; 40,000 mg DL- $\alpha$ -tocopheryl acetate; 4,500 mg menadione sodium bisulphite; 1,500 mg thiamin; 3,500 mg riboflavin; 3,000 mg pyridoxine HCl; 12.5  $\mu$ g cobalamin; 25,000 mg niacin; 75 mg biotin; 750 mg folic acid; 7,500 mg pantothenic acid.

<sup>3</sup>Contents per kg: 200,000 mg choline chloride; 25,000 mg Fe; 45,000 mg Zn; 65,000 mg Mn; 10,000 mg Cu; 750 mg I; 150 mg Se.

**Table S2.** Composition of reagents used for *C. jejuni* DNA extraction.

| Reagent          | Composition                                                                                                          |
|------------------|----------------------------------------------------------------------------------------------------------------------|
| Dispersal buffer | 50 mM Tris-HCl, 50 mM ethylenediaminetetraacetate (EDTA), 1% v/v TritonX-100, pH 7.5                                 |
| Lysis buffer I   | 50 mM Tris-HCl, 50 mM EDTA, 4 M GuHCl, 10 mM CaCl <sub>2</sub> , 1% v/v Triton x-100, 2% N-Lauroyl-Sarcosine, pH 7.5 |
| Lysis buffer II  | 50 mM Tris-HCl, 25 mM EDTA, 8 M GuHCl, 3% v/v Triton X-100, 3% N-Lauroyl-Sarcosine, pH 6.3                           |
| Wash I buffer    | 25 mM Tris-HCl, 4 M GHCl, 50% ethanol, pH 6.6                                                                        |
| Wash buffer II   | 10 mM Tris-HCl, 80% ethanol, 100 mM NaCl, pH 6.6                                                                     |

All reagents used were purchased from Sigma-Aldrich (St Louis, USA)
